# Supplementary material for: Evolutionary redesign of the Atlantic cod (Gadus morhua L.) Toll-like receptor repertoire by gene losses and expansions
Source: PubMed Central journal article supplement (PMC4850435; doi:10.1038/srep25211), 2016-04-29
Supplement: srep25211-s1.pdf [file srep25211-s1.pdf]

## Supplementary information

### Evolutionary redesign of the Atlantic cod (*Gadus morhua* L.) Toll-like receptor repertoire by gene losses and expansions

Monica H. Solbakken<sup>1\*</sup>, Ole K. Tørresen<sup>1</sup>, Alexander J. Nederbragt<sup>1</sup>, Marit Seppola<sup>2</sup>, Tone F. Gregers<sup>3</sup>, Kjetill S. Jakobsen<sup>1</sup>, Sissel Jentoft<sup>1,4</sup>

**Supplementary table 1** – An overview over all genes searched for belonging to the most common PRR families. Putative hits indicate that phylogenetic analysis should be performed to determine family member.

| Gene    | Query species                                     | Pathway                                                      | Blast hit comment          | Blast hit region<br>Celera140828_<br>pbjellypilon                                                                                                                  |
|---------|---------------------------------------------------|--------------------------------------------------------------|----------------------------|--------------------------------------------------------------------------------------------------------------------------------------------------------------------|
| AIM2    | HOSA,<br>MUMU                                     | NOD-like receptor, Pattern recognition receptor (PRR)        | No clear sequence homology |                                                                                                                                                                    |
| APCS    | HOSA,<br>DARE,<br>MUMU,<br>XETR                   | Pentraxins - Pattern recognition receptor (PRR)              | No clear sequence homology | Does overlap somewhat with CRP hits                                                                                                                                |
| CD14    | HOSA,<br>MUMU,<br>XETR                            | Pattern recognition receptor (PRR)                           | No clear sequence homology |                                                                                                                                                                    |
| CLC4E   | HOSA,<br>MUMU,<br>XETR                            | C-type lectin domain family                                  | No clear sequence homology |                                                                                                                                                                    |
| CLC6A   | HOSA,<br>MUMU,<br>TARU,<br>TENI,<br>GAAC          | C-type lectin domain family                                  | No clear sequence homology |                                                                                                                                                                    |
| CLC7A   | HOSA,<br>MUMU                                     | C-type lectin domain family                                  | No clear sequence homology |                                                                                                                                                                    |
| COLEC10 | HOSA,<br>GAAC,<br>TARU                            | Collectin - C-type lectin Pattern recognition receptor (PRR) | Yes                        | Contig1376_pilon                                                                                                                                                   |
| COLEC11 | GAMO,<br>HOSA,<br>GAAC,<br>TARU                   | Collectin - C-type lectin Pattern recognition receptor (PRR) | yes                        | Contig847_pilon                                                                                                                                                    |
| COLEC12 | GAMO,<br>GAAC,<br>TARU,<br>HOSA                   | Collectin - C-type lectin Pattern recognition receptor (PRR) | yes                        | Contig2237_pilon,<br>Contig2157_pilon,<br>Contig298_pilon                                                                                                          |
| CRP     | GAMO,<br>DARE,<br>HOSA,<br>MUMU,<br>SASA,<br>XETR | Pentraxins - Pattern recognition receptor (PRR)              | Yes, but weak homology     | Contig1070_pilon,<br>Contig1499_pilon,<br>Contig1934_pilon,<br>Contig2939_pilon,<br>Contig5417_pilon,<br>Contig805_pilon,<br>Contig7743_pilon,<br>Contig1220_pilon |

|                     |                                                   |                                                                                             |                               |                                                                                                                                            |
|---------------------|---------------------------------------------------|---------------------------------------------------------------------------------------------|-------------------------------|--------------------------------------------------------------------------------------------------------------------------------------------|
| Ficolin1, 2, 3, A/B | HOSA,<br>MUMU                                     | Patter recognition receptor,<br>collectin family, complement<br>activating                  | Yes, putative                 | Contig1126_pilon,<br>Contig9321_pilon                                                                                                      |
| FP                  | CRIMI                                             | Pentraxins - Pattern recognition<br>receptor (PRR)                                          | No clear sequence<br>homology | Does overlap<br>somewhat with CRP<br>hits                                                                                                  |
| LGP2                | GAMO,<br>GAAC,<br>DARE,<br>HOSA,<br>TARU          | RIG-like receptors Pattern<br>recognition receptor (PRR)                                    | Yes                           | Contig795_pilon                                                                                                                            |
| MBL2                | HOSA,<br>MUMU,<br>ONMY,<br>SASA                   | Pattern recognition receptor,<br>Collectin, mannose binding lectin<br>complement activating | No clear sequence<br>homology |                                                                                                                                            |
| MDA5                | DARE,<br>GAAC,<br>HOSA,<br>TARU                   | RIG-like receptors Pattern<br>recognition receptor (PRR)                                    | Yes                           | Contig5186_pilon,<br>Contig795_pilon,<br>Contig2519_pilon                                                                                  |
| MRC1                | HOSA,<br>MUMU,<br>XETR                            | Macrophage mannose receptors<br>Pattern recognition receptor (PRR)                          | Yes                           | Contig2237_pilon                                                                                                                           |
| MRC2                | GAAC,<br>GAMO,<br>HOSA,<br>MUMU,<br>TARU,<br>XETR | Macrophage mannose receptors<br>Pattern recognition receptor (PRR)                          | Yes                           | Contig6711_pilon                                                                                                                           |
| MSR1                | HOSA,<br>MUMU,<br>XETR                            | Macrophage scavenger receptors<br>Pattern recognition receptor (PRR)                        | Yes, expanded                 | Contig8844_pilon,<br>Contig8342_pilon,<br>Contig309_pilon,<br>Contig2235_pilon,<br>Contig830_pilon,<br>Contig208_pilon,<br>Contig669_pilon |
| NAIP                | HOSA,<br>MUMU,<br>XETR                            | NOD-like receptor, Pattern<br>recognition receptor (PRR)                                    | Yes, but weak<br>homology     | Contig50_pilon                                                                                                                             |
| NLRC3               | GAMO,<br>HOSA,<br>TARU                            | NOD-like receptor CARD domain<br>containing, Pattern recognition<br>receptor (PRR)          | Yes                           | Contig1688_pilon                                                                                                                           |
| NLRC4               | HOSA,<br>XETR                                     | NOD-like receptor CARD domain<br>containing, Pattern recognition<br>receptor (PRR)          | No clear sequence<br>homology |                                                                                                                                            |
| NLRC5               | HOSA,<br>GAAC,<br>XETR                            | NOD-like receptor CARD domain<br>containing, Pattern recognition<br>receptor (PRR)          | No clear sequence<br>homology |                                                                                                                                            |
| NLRP1               | HOSA,<br>MUMU                                     | Pattern recognition receptor, NOD<br>like pyrin containing family                           | No clear sequence<br>homology |                                                                                                                                            |
| NLRP10              | HOSA,<br>MUMU                                     | Pattern recognition receptor, NOD<br>like pyrin containing family                           | No clear sequence<br>homology |                                                                                                                                            |
| NLRP11              | HOSA                                              | Pattern recognition receptor, NOD<br>like pyrin containing family                           | No clear sequence<br>homology |                                                                                                                                            |
| NLRP12              | HOSA,<br>MUMU                                     | Pattern recognition receptor, NOD<br>like pyrin containing family                           | No clear sequence<br>homology |                                                                                                                                            |
| NLRP13              | HOSA                                              | Pattern recognition receptor, NOD<br>like pyrin containing family                           | No clear sequence<br>homology |                                                                                                                                            |

|                       |                                          |                                                                                                 |                                          |                                      |
|-----------------------|------------------------------------------|-------------------------------------------------------------------------------------------------|------------------------------------------|--------------------------------------|
| NLRP14                | HOSA,<br>MUMU                            | Pattern recognition receptor, NOD like pyrin containing family                                  | No clear sequence homology               |                                      |
| NLRP2                 | HOSA                                     | Pattern recognition receptor, NOD like pyrin containing family                                  | No clear sequence homology               |                                      |
| NLRP3                 | HOSA,<br>MUMU                            | Pattern recognition receptor, NOD like pyrin containing family                                  | No clear sequence homology               |                                      |
| NLRP4                 | HOSA,<br>MUMU                            | Pattern recognition receptor, NOD like pyrin containing family                                  | No clear sequence homology               |                                      |
| NLRP5                 | HOSA,<br>MUMU                            | Pattern recognition receptor, NOD like pyrin containing family                                  | No clear sequence homology               |                                      |
| NLRP6                 | HOSA,<br>MUMU                            | Pattern recognition receptor, NOD like pyrin containing family                                  | No clear sequence homology               |                                      |
| NLRP7                 | HOSA                                     | Pattern recognition receptor, NOD like pyrin containing family                                  | No clear sequence homology               |                                      |
| NLRP8                 | HOSA                                     | Pattern recognition receptor, NOD like pyrin containing family                                  | No clear sequence homology               |                                      |
| NLRP9                 | HOSA,<br>MUMU                            | Pattern recognition receptor, NOD like pyrin containing family                                  | No clear sequence homology               |                                      |
| NLRX1                 | GAMO,<br>GAAC,<br>HOSA                   | NOD-like receptor, Pattern recognition receptor (PRR)                                           | Yes                                      | Contig450_pilon                      |
| NOD1                  | GAMO,<br>GAAC,<br>HOSA,<br>ORLA,<br>TARU | Nucleotide oligomerization domain (NOD) containing receptors Pattern recognition receptor (PRR) | Yes                                      | Contig619_pilon                      |
| NOD2                  | HOSA,<br>GAAC,<br>ORLA                   | Nucleotide oligomerization domain (NOD) containing receptors Pattern recognition receptor (PRR) | No clear sequence homology               |                                      |
| PGRP_La1, La2,<br>La3 | TENI                                     | Peptidoglycan_recognition_protein                                                               | Yes, unable to separate La1, LA2 and La3 | Contig364_pilon,<br>Contig1756_pilon |
| PGRP1                 | HOSA,<br>MUMU                            | Peptidoglycan_recognition_protein                                                               | Weak sequence homology                   | Contig364_pilon,<br>Contig1756_pilon |
| PGRP2                 | HOSA,<br>MUMU                            | Peptidoglycan_recognition_protein                                                               | Weak sequence homology                   | Contig364_pilon,<br>Contig1756_pilon |
| PGRP3                 | HOSA,<br>MUMU                            | Peptidoglycan_recognition_protein                                                               | Weak sequence homology                   | Contig364_pilon,<br>Contig1756_pilon |
| PGRP4                 | HOSA,<br>MUMU                            | Peptidoglycan_recognition_protein                                                               | Weak sequence homology                   | Contig364_pilon,<br>Contig1756_pilon |
| PGRP5                 | CTEID                                    | Peptidoglycan_recognition_protein                                                               | Weak sequence homology                   | Contig364_pilon,<br>Contig1756_pilon |
| PTX3                  | GAMO,<br>HOSA,<br>ORLA,<br>TARU          | Pentraxins - Pattern recognition receptor (PRR)                                                 | Yes                                      | Contig249_pilon                      |

|                               |                                                    |                                                                 |                               |                  |
|-------------------------------|----------------------------------------------------|-----------------------------------------------------------------|-------------------------------|------------------|
| RIG_I                         | HOSA,<br>DARE,<br>MUMU,<br>SASA,<br>XETR,<br>CYPCA | RIG-like receptors Pattern<br>recognition receptor (PRR)        | No clear sequence<br>homology | Hits LGP2 region |
| Surfactant protein<br>A1/A2/D | HOSA                                               | Collectin - C-type lectin Pattern<br>recognition receptor (PRR) | No clear sequence<br>homology |                  |

**Supplementary table 2** – Overview over all *TLR* sequences included in this study. \*TLR1\_GAGA was recently discontinued from the Ensembl database.

| Gene_species    | Identifiers                       | Source      |
|-----------------|-----------------------------------|-------------|
| <b>Outgroup</b> |                                   |             |
| BRBE            | Q1KVP8                            | Uniprot     |
| TLR1/6/10       |                                   |             |
| TLR1_6a_LACH    | ENSLACT00000011495                | Ensembl v78 |
| TLR1_6a_LEOC    | ENSLOCT00000015924                | Ensembl v78 |
| TLR1_6_ASME     | ENSAMXT00000026289                | Ensembl v78 |
| TLR1_6b_LACH    | ENSLACT00000017309                | Ensembl v78 |
| TLR1_6b_LEOC    | ENSLOCT00000021874                | Ensembl v78 |
| TLR1_6_POFO     | ENSPFOT00000020197                | Ensembl v78 |
| TLR1_6_TARU     | ENSTRUT00000025237                | Ensembl v67 |
| TLR1_6_TENI     | ENSTNIT00000017441                | Ensembl v67 |
| TLR1_6a_ANCA    | ENSACAT00000007334<br>+ 2000bp 5' | Ensembl v67 |
| TLR1_6b_ANCA    | ENSACAT00000024231                | Ensembl v67 |
| TLR1_DARE       | ENSDART00000063176                | Ensembl v67 |
| TLR1_GAGA*      | ENSGALT00000037374                | Ensembl v67 |
| TLR1_HOSA       | ENST00000502213                   | Ensembl v67 |
| TLR1a_PEMA      | ENSPMAT00000011445                | Ensembl v67 |
| TLR1b_PEMA      | ENSPMAT00000011446                | Ensembl v67 |
| TLR6_GAAC       | ENSGACT00000023764                | Ensembl v67 |
| TLR6_GAGA       | ENSGALT00000028179                | Ensembl v67 |
| TLR6_HOSA       | ENST00000381950                   | Ensembl v67 |
| TLR6_ORLA       | ENSORLT00000005546                | Ensembl v67 |
| TLR6a_XETR      | ENSXETT00000057556                | Ensembl v67 |
| TLR6b_XETR      | ENSXETT00000057561                | Ensembl v67 |
| TLR1_6_XIMA     | JH556664.1:787041:791499          | Ensembl v78 |
| TLR10_HOSA      | ENST00000308973                   | Ensembl v67 |
| <b>TLR2</b>     |                                   |             |
| TLR2a_XIMA      | ENSXMAT00000008287                | Ensembl v78 |
| TLR2_ASME       | ENSAMXT00000026308                | Ensembl v78 |
| TLR2b_XIMA      | ENSXMAT00000008292                | Ensembl v78 |
| TLR2_DARE       | ENSDART00000122568                | Ensembl v67 |
| TLR2_GAAC       | ENSGACT00000024730                | Ensembl v67 |
| TLR2_HOSA       | ENST00000260010                   | Ensembl v67 |
| TLR2_LACH       | ENSLACT00000014405                | Ensembl v78 |
| TLR2_LEOC       | ENSLOCT00000022362                | Ensembl v78 |
| TLR2_ORLA       | ENSORLT00000003160                | Ensembl v67 |
| TLR2_ORNI       | ENSONIT00000017759                | Ensembl v67 |
| TLR2_TARU       | ENSTRUT00000007500                | Ensembl v67 |
| TLR2_TENI       | Un_random:56715842-56719817       | Ensembl v78 |
| TLR2a_ANCA      | ENSACAT00000027553                | Ensembl v67 |
| TLR2a_GAGA      | ENSGALT00000015034                | Ensembl v67 |
| TLR2a_XETR      | ENSXETT00000003822                | Ensembl v67 |

|             |                            |                            |
|-------------|----------------------------|----------------------------|
| TLR2b_ANCA  | ENSACAT00000021129         | Ensembl v67                |
| TLR2b_GAGA  | ENSGALT00000015036         | Ensembl v67                |
| TLR2b_XETR  | ENSXETT00000003835         | Ensembl v67                |
| TLR2_POFO   | ENSPFOT00000000534         | Ensembl v78                |
| <hr/>       |                            |                            |
| TLR3        |                            |                            |
| TLR3_ANCA   | ENSACAT00000001699         | Ensembl v67                |
| TLR3_DARE   | ENSDART00000013021         | Ensembl v67                |
| TLR3_GAAC   | ENSGACT00000022330         | Ensembl v67                |
| TLR3_GAGA   | ENSGALT00000021952         | Ensembl v67                |
| TLR3_GAMO   | Contig1920                 | Celera140828_pbjelly_pilon |
| TLR3_HOSA   | ENST00000296795            | Ensembl v67                |
| TLR3_LEOC   | ENSLOCT00000017076         | Ensembl v78                |
| TLR3_ORLA   | ENSORLT00000010278         | Ensembl v67                |
| TLR3_ORNI   | ENSONIT00000012803         | Ensembl v67                |
| TLR3_PEMA   | ENSPMAT00000001785         | Ensembl v67                |
| TLR3_POFO   | ENSPFOT00000005820         | Ensembl v78                |
| TLR3_TARU   | ENSTRUT00000012255         | Ensembl v67                |
| TLR3_TENI   | ENSTNIT00000010103         | Ensembl v67                |
| TLR3_XETR   | ENSXETT00000012947         | Ensembl v67                |
| TLR3_XIMA   | ENSXMAT00000018937         | Ensembl v78                |
| TLR3_LACH   | ENSLACT00000013051         | Ensembl v78                |
| TLR3_ASME   | ENSAMXT00000020816 partial | Ensembl v78                |
| <hr/>       |                            |                            |
| TLR4        |                            |                            |
| TLR4a_DARE  | ENSDART00000124036         | Ensembl v67                |
| TLR4_ANCA   | ENSACAT00000013935         | Ensembl v67                |
| TLR4b_DARE  | ENSDART00000034852         | Ensembl v67                |
| TLR4_GAGA   | ENSGALT00000011333         | Ensembl v67                |
| TLR4_HOSA   | ENST00000355622            | Ensembl v67                |
| TLR4aI_DARE | ENSDART00000113952         | Ensembl v67                |
| <hr/>       |                            |                            |
| TLR5        |                            |                            |
| TLR5a_DARE  | ENSDART00000148798         | Ensembl v67                |
| TLR5a_GAAC  | ENSGACT00000005799         | Ensembl v67                |
| TLR5a_ORLA  | ENSORLT00000020304         | Ensembl v67                |
| TLR5a_ORNI  | ENSONIT00000001682         | Ensembl v67                |
| TLR5a_TARU  | ENSTRUT00000011390         | Ensembl v67                |
| TLR5_ANCA   | ENSACAT00000002427         | Ensembl v67                |
| TLR5_ASME   | ENSAMXT00000026738         | Ensembl v78                |
| TLR5b_DARE  | ENSDART00000150030         | Ensembl v67                |
| TLR5b_GAAC  | ENSGACT00000009486 partial | Ensembl v67                |
| TLR5c_GAAC  | ENSGACT00000009484 partial | Ensembl v67                |
| TLR5_GAGA   | ENSGALT00000015302         | Ensembl v67                |
| TLR5_HOSA   | ENST00000366881            | Ensembl v67                |
| TLR5_LACH   | ENSLACT00000017589         | Ensembl v78                |
| TLR5_LEOC   | ENSLOCT00000022142         | Ensembl v78                |
| TLR5_POFO   | ENSPFOT00000000699         | Ensembl v78                |
| TLR5_TENI   | ENSTNIT00000008908         | Ensembl v67                |

|                |                            |                            |
|----------------|----------------------------|----------------------------|
| TLR5_XETR      | ENSXETT00000032872         | Ensembl v67                |
| TLR5_XIMA      | ENSXMAT00000001788         | Ensembl v78                |
| <hr/>          |                            |                            |
| TLR7/8/9       |                            |                            |
| <hr/>          |                            |                            |
| TLR7_8_9a_PEMA | ENSPMAT00000002559         | Ensembl v67                |
| TLR7_8_9b_PEMA | ENSPMAT00000006917         | Ensembl v67                |
| TLR7a_GAMO     | Contig1607                 | Celera140828_pbjelly_pilon |
| TLR7a_LACH     | ENSLACT00000001169         | Ensembl v78                |
| TLR7_ANCA      | ENSACAT00000001581         | Ensembl v67                |
| TLR7_ASME      | ENSAMXT00000026786         | Ensembl v78                |
| TLR7b_GAMO     | Contig1607                 | Celera140828_pbjelly_pilon |
| TLR7b_LACH     | ENSLACT00000004799         | Ensembl v78                |
| TLR7c_GAMO     | Contig8584                 | Celera140828_pbjelly_pilon |
| TLR7_DARE      | ENSDART00000130393         | Ensembl v67                |
| TLR7_GAAC      | ENSGACT00000005274         | Ensembl v67                |
| TLR7_GAGA      | ENSGALT00000026777         | Ensembl v67                |
| TLR7_HOSA      | ENST00000380659            | Ensembl v67                |
| TLR7_LEOC      | ENSLOCT00000012218         | Ensembl v78                |
| TLR7_ORLA      | 21:26169462:26173343       | Ensembl v67                |
| TLR7_ORNI      | GL831311.1:1118220:1122015 | Ensembl v67                |
| TLR7_POFO      | ENSPFOT00000025479         | Ensembl v78                |
| TLR7_TARU      | scaffold_103:438696-441905 | Ensembl v67                |
| TLR7_TENI      | 2:12682773-12685934        | Ensembl v78                |
| TLR7_XETR      | ENSXETT00000011725         | Ensembl v67                |
| TLR7_XIMA      | ENSXMAT00000004441         | Ensembl v78                |
| TLR8a_ASME     | ENSAMXT00000026340         | Ensembl v78                |
| TLR8a_DARE     | ENSDART00000124995         | Ensembl v67                |
| TLR8a_GAMO     | Contig1607                 | Celera140828_pbjelly_pilon |
| TLR8a_LEOC     | ENSLOCT00000012227         | Ensembl v78                |
| TLR8b_ASME     | ENSAMXT00000001765         | Ensembl v78                |
| TLR8b_DARE     | ENSDART00000110194         | Ensembl v67                |
| TLR8b_GAMO     | Contig1607                 | Celera140828_pbjelly_pilon |
| TLR8b_LEOC     | ENSLOCT00000012238         | Ensembl v78                |
| TLR8c_GAMO     | Contig1607                 | Celera140828_pbjelly_pilon |
| TLR8d_GAMO     | Contig1607                 | Celera140828_pbjelly_pilon |
| TLR8e_GAMO     | Contig1607                 | Celera140828_pbjelly_pilon |
| TLR8f_GAMO     | Contig1607                 | Celera140828_pbjelly_pilon |
| TLR8g_GAMO     | Contig1607                 | Celera140828_pbjelly_pilon |
| TLR8h_GAMO     | Contig1607                 | Celera140828_pbjelly_pilon |
| TLR8i_GAMO     | Contig1607                 | Celera140828_pbjelly_pilon |
| TLR8j_GAMO     | Contig1329                 | Celera140828_pbjelly_pilon |
| TLR8k_GAMO     | Contig1329                 | Celera140828_pbjelly_pilon |
| TLR8l_GAMO     | Contig8584                 | Celera140828_pbjelly_pilon |
| TLR8_GAAC      | ENSGACT00000005251         | Ensembl v67                |
| TLR8_HOSA      | ENST00000218032            | Ensembl v67                |
| TLR8_LACH      | ENSLACT00000019040         | Ensembl v78                |
| TLR8_ORLA      | 21:26174329:26178070       | Ensembl v67                |

|             |                                                  |                            |
|-------------|--------------------------------------------------|----------------------------|
| TLR8_ORNI   | GL831311.1:1102783-1105960<br>partial TIR in gap | Ensembl v78                |
| TLR8_POFO   | ENSPFOT00000023362                               | Ensembl v78                |
| TLR8_TARU   | scaffold_103:442965-446072                       | Ensembl v78                |
| TLR8_TENI   | 2:12678635-12681709                              | Ensembl v78                |
| TLR8_XETR   | ENSXETT00000063320                               | Ensembl v67                |
| TLR8_XIMA   | ENSXMAT00000004440                               | Ensembl v78                |
| TLR9a_GAMO  | Contig57                                         | Celera140828_pbjelly_pilon |
| TLR9a_LEOC  | ENSLOCT00000017524                               | Ensembl v78                |
| TLR9a_POFO  | ENSPFOT00000000378                               | Ensembl v78                |
| TLR9_ASME   | ENSAMXT00000027071                               | Ensembl v78                |
| TLR9b_GAMO  | Contig57                                         | Celera140828_pbjelly_pilon |
| TLR9b_LEOC  | ENSLOCT00000017790                               | Ensembl v78                |
| TLR9b_POFO  | ENSPFOT00000023878                               | Ensembl v78                |
| TLR9c_GAMO  | Contig57                                         | Celera140828_pbjelly_pilon |
| TLR9d_GAMO  | Contig57                                         | Celera140828_pbjelly_pilon |
| TLR9_DARE   | ENS DART00000124218                              | Ensembl v67                |
| TLR9e_GAMO  | Contig57                                         | Celera140828_pbjelly_pilon |
| TLR9_GAAC   | ENSGACT00000013450                               | Ensembl v67                |
| TLR9_HOSA   | ENST00000360658                                  | Ensembl v67                |
| TLR9_LACH   | ENSLACT00000021105                               | Ensembl v78                |
| TLR9_ORLA   | ENSORLT00000011109                               | Ensembl v67                |
| TLR9_ORNI   | ENSONIT00000015652                               | Ensembl v67                |
| TLR9_TARU   | ENSTRUT00000019252                               | Ensembl v67                |
| TLR9_TENI   | ENSTNIT00000018282                               | Ensembl v67                |
| TLR9_XETR   | ENSXETT00000013094                               | Ensembl v67                |
| TLR9_XIMA   | ENSXMAT00000007659                               | Ensembl v78                |
| <hr/>       |                                                  |                            |
| TLR11/12/13 |                                                  |                            |
| <hr/>       |                                                  |                            |
| TLR11_MUMU  | ENSMUST00000063570                               | Ensembl v67                |
| TLR11_RANO  | ENSRNOT00000039925                               | Ensembl v67                |
| TLR12_MUMU  | ENSMUST00000074829                               | Ensembl v67                |
| TLR12_RANO  | ENSRNOT00000065640                               | Ensembl v67                |
| TLR13a_LACH | ENSLACT00000007245                               | Ensembl v78                |
| TLR13_ANCA  | ENSACAT00000016690                               | Ensembl v67                |
| TLR13b_LACH | ENSLACT00000014715                               | Ensembl v78                |
| TLR13_MUMU  | ENSMUST00000040065                               | Ensembl v67                |
| TLR13_XETR  | ENSXETT00000009956                               | Ensembl v67                |
| <hr/>       |                                                  |                            |
| TLR14       |                                                  |                            |
| <hr/>       |                                                  |                            |
| TLR14_ANCA  | ENSACAT00000022679                               | Ensembl v67                |
| TLR14_ASME  | ENSAMXT00000019326                               | Ensembl v78                |
| TLR14_DARE  | ENS DART00000149289                              | Ensembl v67                |
| TLR14_GAAC  | ENSGACT00000002286                               | Ensembl v67                |
| TLR14_GAMO  | Contig2455                                       | Celera140828_pbjelly_pilon |
| TLR14_LACH  | ENSLACT00000020278                               | Ensembl v78                |
| TLR14_LEOC  | ENSLOCT00000009719                               | Ensembl v78                |
| TLR14_ORLA  | ENSORLT00000019664                               | Ensembl v67                |



|             |                                                  |                            |
|-------------|--------------------------------------------------|----------------------------|
| TLR14_ORNI  | ENSONIT00000008447                               | Ensembl v67                |
| TLR14_PEMA  | ENSPMAT00000002031 partial<br>end of scaffold    | Ensembl v67                |
| TLR14_POFO  | ENSPFOT00000018436                               | Ensembl v78                |
| TLR14_TARU  | ENSTRUT00000001047                               | Ensembl v67                |
| TLR14_TENI  | ENSTNIT00000009097 Partial<br>TIR in gap         | Ensembl v67                |
| TLR14_XIMA  | ENSXMAT00000013405                               | Ensembl v78                |
| TLR14a_XETR | ENSXETT00000054703                               | Ensembl v67                |
| TLR14b_XETR | ENSXETT00000038393                               | Ensembl v67                |
| TLR14c_XETR | ENSXETT00000054700                               | Ensembl v67                |
| TLR14d_XETR | ENSXETT00000054707                               | Ensembl v67                |
| <hr/>       |                                                  |                            |
| TLR15       |                                                  |                            |
| <hr/>       |                                                  |                            |
| TLR15_ANCA  | ENSACAT00000024923<br>+ 3000 bp 5' leader in gap | Ensembl v78                |
| TLR15_GAGA  | ENSGALT00000013275                               | Ensembl v67                |
| <hr/>       |                                                  |                            |
| TLR21       |                                                  |                            |
| <hr/>       |                                                  |                            |
| TLR21a_GAAC | ENSGACT00000012366                               | Ensembl v67                |
| TLR21a_LACH | ENSLACT00000001213                               | Ensembl v78                |
| TLR21_ANCA  | ENSACAT00000015088                               | Ensembl v67                |
| TLR21_ASME  | ENSAMXT00000025862                               | Ensembl v78                |
| TLR21b_GAAC | ENSGACT00000011120                               | Ensembl v67                |
| TLR21b_LACH | ENSLACT00000002997                               | Ensembl v78                |
| TLR21_DARE  | ENSDART00000060142                               | Ensembl v67                |
| TLR21_GAGA  | ENSGALT00000001120                               | Ensembl v67                |
| TLR21_GAMO  | Contig175                                        | Celera140828_pbjelly_pilon |
| TLR21_ORLA  | ENSORLT00000016853                               | Ensembl v67                |
| TLR21_ORNI  | ENSONIT00000025851                               | Ensembl v67                |
| TLR21_POFO  | ENSPFOT00000020466                               | Ensembl v78                |
| TLR21_TARU  | ENSTRUT00000009778                               | Ensembl v67                |
| TLR21_TENI  | 8:1034243:1037340                                | Ensembl v78                |
| TLR21_XETR  | ENSXETT00000061166                               | Ensembl v67                |
| TLR21a_PEMA | ENSPMAT00000011126                               | Ensembl v67                |
| TLR21b_PEMA | ENSPMAT00000011208                               | Ensembl v67                |
| TLR21c_PEMA | ENSPMAT00000005511                               | Ensembl v67                |
| TLR21_XIMA  | ENSXMAT00000010804 partial                       | Ensembl v78                |
| <hr/>       |                                                  |                            |
| TLR22       |                                                  |                            |
| <hr/>       |                                                  |                            |
| TLR22a_GAMO | Contig1071                                       | Celera140828_pbjelly_pilon |
| TLR22b_GAMO | Contig1071                                       | Celera140828_pbjelly_pilon |
| TLR22c_GAMO | Contig282                                        | Celera140828_pbjelly_pilon |
| TLR22d_GAMO | Contig7090                                       | Celera140828_pbjelly_pilon |
| TLR22e_GAMO | Contig282                                        | Celera140828_pbjelly_pilon |
| TLR22f_GAMO | Contig180                                        | Celera140828_pbjelly_pilon |
| TLR22g_GAMO | Contig661                                        | Celera140828_pbjelly_pilon |
| TLR22_GAAC  | ENSGACT00000007216                               | Ensembl v67                |
| TLR22h_GAMO | Contig661                                        | Celera140828_pbjelly_pilon |
| TLR22i_GAMO | Contig1563                                       | Celera140828_pbjelly_pilon |

|             |                          |                            |
|-------------|--------------------------|----------------------------|
| TLR22j_GAMO | Contig9248               | Celera140828_pbjelly_pilon |
| TLR22k_GAMO | Contig7090               | Celera140828_pbjelly_pilon |
| TLR22l_GAMO | Contig282                | Celera140828_pbjelly_pilon |
| TLR22_ORLA  | ENSORLT00000025295       | Ensembl v67                |
| TLR22_ORNI  | ENSONIT00000008197       | Ensembl v67                |
| TLR22_POFO  | ENSPFOT00000004640       | Ensembl v78                |
| TLR22_TARU  | ENSTRUT00000015141       | Ensembl v67                |
| TLR22_TENI  | ENSTNIT00000016840       | Ensembl v67                |
| TLR22a_XIMA | JH557120.1:130052-135644 | Ensembl v78                |
| TLR22b_XIMA | JH557120.1:121404-127621 | Ensembl v78                |

---

TLR23

|             |                          |                            |
|-------------|--------------------------|----------------------------|
| TLR23a_ASME | ENSAMXT00000025783       | Ensembl v78                |
| TLR23a_ORNI | ENSONIT00000014707       | Ensembl v67                |
| TLR23a_POFO | ENSPFOT00000027239       | Ensembl v78                |
| TLR23_ANCA  | ENSACAT00000023214       | Ensembl v67                |
| TLR23b_ASME | ENSAMXT00000026733       | Ensembl v78                |
| TLR23b_ORNI | ENSONIT00000004968       | Ensembl v67                |
| TLR23b_POFO | ENSPFOT00000031308       | Ensembl v78                |
| TLR23c_ASME | ENSAMXT00000026734       | Ensembl v78                |
| TLR23c_POFO | ENSPFOT00000011105       | Ensembl v78                |
| TLR23_LEOC  | ENSLOCT00000022458       | Ensembl v78                |
| TLR23_TARU  | ENSTRUT00000010682       | Ensembl v67                |
| TLR23_TENI  | ENSTNIT00000008231       | Ensembl v67                |
| TLR23_XETR  | ENSXETT00000055333       | Ensembl v67                |
| TLR23_GAMO  | Contig4895               | Celera140828_pbjelly_pilon |
| TLR23_XIMA  | JH556800.1:603094-607350 | Ensembl v78                |

---

TLR25

|             |                    |                            |
|-------------|--------------------|----------------------------|
| TLR25a_LEOC | ENSLOCT00000020915 | Ensembl v78                |
| TLR25b_LEOC | ENSLOCT00000022053 | Ensembl v78                |
| TLR25_ICPU  | HQ677726.1         | GenBank 2013_08            |
| TLR25_ORLA  | ENSORLT00000015995 | Ensembl v67                |
| TLR25_ORNI  | ENSONIT00000017803 | Ensembl v67                |
| TLR25a_GAMO | Contig177          | Celera140828_pbjelly_pilon |
| TLR25a_PEMA | ENSPMAT00000011112 | Ensembl v67                |
| TLR25b_GAMO | Contig177          | Celera140828_pbjelly_pilon |
| TLR25b_PEMA | ENSPMAT00000011257 | Ensembl v67                |
| TLR25c_GAMO | Contig4860         | Celera140828_pbjelly_pilon |
| TLR25d_GAMO | Contig4860         | Celera140828_pbjelly_pilon |
| TLR25e_GAMO | Contig4860         | Celera140828_pbjelly_pilon |
| TLR25f_GAMO | Contig2404         | Celera140828_pbjelly_pilon |
| TLR25g_GAMO | Contig4860         | Celera140828_pbjelly_pilon |

---

TLR26

|             |                      |                 |
|-------------|----------------------|-----------------|
| TLR26_ASME  | ENSAMXT00000026984   | Ensembl v78     |
| TLR26_ICPU  | AEI59681.1 (GenBank) | GenBank 2013_08 |
| TLR26_XETR  | ENSXETT00000060548   | Ensembl v67     |
| TLR26a_DARE | ENSDART00000124265   | Ensembl v67     |

**Supplementary table 3** – Species overview with abbreviations, common names and latin names

| <b>Abbreviation</b> | <b>Common name</b> | <b>Latin name</b>              |
|---------------------|--------------------|--------------------------------|
| BRBE                | Amphioxus          | <i>Branchiostoma belcheri</i>  |
| ANCA                | Anole lizzard      | <i>Anolis carolinensis</i>     |
| ASME                | Cave fish          | <i>Astyanax mexicanus</i>      |
| CTEID               | Grass carp         | <i>Ctenopharyngodon idella</i> |
| CRIMI               | Gray dwarf hamster | <i>Cricetulus migratorius</i>  |
| CYPCA               | Common carp        | <i>Cyprinus carpio</i>         |
| DARE                | Zebrafish          | <i>Danio rerio</i>             |
| GAAC                | Stickleback        | <i>Gasterosteus aculeatus</i>  |
| GAGA                | Chicken            | <i>Gallus gallus</i>           |
| GAMO                | Atlantic cod       | <i>Gadus morhua</i>            |
| HOSA                | Human              | <i>Homo sapiens</i>            |
| ICPU                | Channel catfish    | <i>Ictalurus punctatus</i>     |
| LACH                | Coelacanth         | <i>Latimeria chalumnae</i>     |
| LEOC                | Spotted gar        | <i>Lepisosteus oculatus</i>    |
| MUMU                | Mouse              | <i>Mus musculus</i>            |
| ONMY                | Rainbow trout      | <i>Oncorhynchus mykiss</i>     |
| ORLA                | Medaka             | <i>Oryzias latipes</i>         |
| ORNI                | Tilapia            | <i>Oreochromis niloticus</i>   |
| PEMA                | Lamprey            | <i>Petromyzon marinus</i>      |
| POFO                | Amazon molly       | <i>Poecilia formosa</i>        |
| RANO                | Rat                | <i>Rattus norvegicus</i>       |
| SASA                | Salmon             | <i>Salmo salar</i>             |
| TARU                | Fugu               | <i>Takifugu rubripes</i>       |
| TENI                | Tetraodon          | <i>Tetraodon nigroviridis</i>  |
| XETR                | Xenopus            | <i>Xenopus tropicalis</i>      |
| XIMA                | Platyfish          | <i>Xiphophorus maculatus</i>   |

**Supplementary table 4** – Reasons for excluding some *TLR* genes found in the Atlantic cod genome from further analysis

| <b>TLR gene</b> | <b>Exclusion comment</b>                        |
|-----------------|-------------------------------------------------|
| TLR7c           | Significant amount of indels and low read count |
| TLR8b           | Missing leader and two larger deletions         |
| TLR8g           | Large deletion and low read count               |
| TLR8h           | Significant amount of indels and low read count |
| TLR8i           | Significant amount of indels                    |
| TLR8k           | Several stop codons and low read count          |
| TLR22i          | Significant amount of indels                    |
| TLR22k          | Significant amount of indels                    |
| TLR25b          | Significant amount of indels and low read count |
| TLR25g          | Significant amount of indels and low read count |

**Supplementary table 5** – Protein queries for mapping of the TLR signaling pathway in Atlantic cod

| <b>Gene</b> | <b>Identifier</b>  |
|-------------|--------------------|
| AKT1        | ENSGMOP00000012247 |

|         |                     |
|---------|---------------------|
| AKT1    | ENSTRUP00000034366  |
| AKT1    | ENSP00000270202     |
| AKT1    | ENSGACP00000008334  |
| AP-1    | ENSGMOP00000011814  |
| AP-1    | ENSGMOP00000016486  |
| AP-1    | ENSGMOP00000011824  |
| AP-1    | ENSTRUP00000026703  |
| AP-1    | ENSGACP00000013845  |
| AP-1    | ENSGACP00000010100  |
| AP-1    | ENSGACP00000013876  |
| AP-1    | ENSP00000306245     |
| CASP8   | ENSGMOP00000001325  |
| CASP8   | ENSTRUP00000024465  |
| CASP8   | ENSP00000351273     |
| CCL3    | ENSP00000225245     |
| CCL3    | ENSMUSP00000001008  |
| CCL4    | ENSP00000250151     |
| CCL4    | ENSMUSP00000019074  |
| CCL5    | ENSTTRP00000005524  |
| CCL5    | ENSP00000293272     |
| CCL5    | ENSMUSP00000039600  |
| CD40    | ENSGMOP00000004266  |
| CD40    | ENSTRUP00000019665  |
| CD40    | ENSP00000361350     |
| CD80    | ENSP00000264246     |
| CD80    | ENSACAP00000020167  |
| CD80    | ENSTTRP00000013645  |
| CD80    | ENSMUSP000000097404 |
| CD80    | ENSP00000264246     |
| CD80    | ENSMUSP000000097404 |
| CD80/86 | B5M0C2              |
| CD86    | ENSTTRP00000010925  |
| CD86    | ENSP00000332049     |
| CD86    | ENSMUSP000000087047 |
| CD86    | ENSP00000332049     |
| CD86    | ENSMUSP000000087047 |
| CTSK    | ENSGMOP00000005371  |
| CTSK    | ENSTRUP00000001247  |
| CTSK    | ENSP00000271651     |
| CXCL10  | ENSP00000305651     |
| CXCL10  | ENSMUSP000000047646 |
| CXCL10  | Q7T0B3              |
| CXCL11  | ENSTTRP00000008519  |
| CXCL11  | ENSP00000306884     |
| CXCL11  | ENSDARP00000115162  |
| CXCL11  | ENSP00000306884     |

|        |                    |
|--------|--------------------|
| CXCL11 | ENSDARP00000116772 |
| CXCL9  | ENSTTRP00000011825 |
| CXCL9  | ENSP00000354901    |
| CXCL9  | ENSMUSP00000108716 |
| CXCL9  | ENSP00000354901    |
| CXCL9  | ENSMUSP00000108716 |
| FADD   | ENSGMOP00000016954 |
| FADD   | ENSP00000301838    |
| FADD   | ENSDARP00000089060 |
| FOS    | ENSGMOP00000011814 |
| FOS    | ENSTRUP00000026703 |
| FOS    | ENSP00000306245    |
| IFNA1  | ENSP00000276927    |
| IFNA1  | ENSMUSP00000092580 |
| IFNA1  | Q6XQG7             |
| IFNAB1 | B7SVJ8             |
| IFNAR  | ENSP00000270139    |
| IFNAR  | ENSGMOP00000012014 |
| IFNAR  | ENSTRUP00000045127 |
| IFNB1  | ENSP00000369581    |
| IFNB1  | ENSMUSP00000056720 |
| IkBa   | ENSGMOP00000009960 |
| IkBa   | ENSGMOP00000018701 |
| IkBa   | ENSTRUP00000011820 |
| IkBa   | ENSTRUP00000012183 |
| IkBa   | ENSP00000216797    |
| IKBKA  | ENSGMOP00000003286 |
| IKBKA  | ENSGMOP00000006411 |
| IKBKA  | ENSTRUP00000022821 |
| IKBKA  | ENSTRUP00000036336 |
| IKBKA  | ENSP00000359424    |
| IKBKB  | ENSGMOP00000012404 |
| IKBKB  | ENSTRUP00000041917 |
| IKBKB  | ENSP00000404920    |
| IKBKG  | ENSGMOP00000006581 |
| IKBKG  | ENSTRUP00000005582 |
| IKBKG  | ENSP00000358614    |
| IL12   | P29459             |
| IL12   | P43431             |
| IL12   | P29460             |
| IL12   | P43432             |
| IL12   | B5XFE3             |
| IL12   | Q2PD23             |
| IL12   | Q2PDJ1             |
| IL12   | Q800F2             |
| IL12   | Q5DVP6             |

|       |                    |
|-------|--------------------|
| IL12  | Q6UAL9             |
| IL12  | Q6UAL8             |
| IL12A | ENSP00000303231    |
| IL12A | ENSMUSP00000029345 |
| IL12A | ENSTTRP00000008806 |
| IL12B | ENSP00000231228    |
| IL12B | ENSMUSP00000099860 |
| IL1B  | ENSGMOP00000000339 |
| IL1B  | ENSTRUP00000040919 |
| IL1B  | ENSP00000263341    |
| IL6   | ENSTRUP00000021935 |
| IL6   | ENSP00000258743    |
| IL6   | ENSXETP00000016123 |
| IL8   | ENSP00000306512    |
| IL8   | ENSORLP00000006429 |
| IL8   | ENSACAP00000011122 |
| IRAK1 | ENSTRUP00000016336 |
| IRAK1 | ENSP00000358991    |
| IRAK1 | ENSGACP00000001480 |
| IRAK4 | ENSGMOP00000009738 |
| IRAK4 | ENSTRUP00000042842 |
| IRAK4 | ENSP00000390651    |
| IRAK4 | ENSGACP00000005317 |
| IRF3  | ENSGMOP00000013712 |
| IRF3  | ENSTRUP00000030442 |
| IRF3  | ENSP00000310127    |
| IRF5  | ENSGMOP00000007757 |
| IRF5  | ENSTRUP00000001526 |
| IRF5  | ENSP00000249375    |
| IRF7  | ENSGMOP00000010233 |
| IRF7  | ENSTRUP00000028834 |
| IRF7  | ENSP00000329411    |
| JNK   | ENSGMOP00000005758 |
| JNK   | ENSTRUP00000032787 |
| JNK   | ENSTRUP00000043883 |
| JNK   | ENSP00000363304    |
| JNK   | ENSGACP00000009405 |
| JNK   | ENSGACP00000007559 |
| LBP   | ENSP00000217407    |
| LBP   | ENSMUSP00000016168 |
| LY96  | ENSTTRP00000012874 |
| LY96  | ENSP00000284818    |
| LY96  | ENSMUSP00000026881 |
| MD-2  | ENSP00000284818    |
| MD-2  | ENSMUSP00000026881 |
| MYD88 | ENSGMOP00000011696 |

|        |                    |
|--------|--------------------|
| MYD88  | ENSTRUP00000044800 |
| MYD88  | ENSGACP00000004643 |
| MYD88  | ENSP00000379625    |
| NFKB1  | ENSGMOP00000008036 |
| NFKB1  | ENSP00000226574    |
| NFKB1  | ENSGACP00000022290 |
| p38    | ENSP00000229795    |
| p38    | ENSDARP00000040361 |
| p38    | ENSDARP00000035686 |
| p38    | ENSMUSP00000004990 |
| PI3KCA | ENSTRUP00000016050 |
| PI3KCA | ENSTRUP00000009530 |
| PI3KCA | ENSP00000263967    |
| PI3KCA | ENSGACP00000021206 |
| PI3KCA | ENSGACP00000008159 |
| PI3KCA | ENSGMOP00000003184 |
| PI3KCA | ENSGMOP00000009146 |
| Rac1   | ENSGMOP00000009517 |
| Rac1   | ENSP00000258737    |
| Rac1   | ENSORLP00000010995 |
| RANTES | ENSP00000293272    |
| RANTES | ENSMUSP00000039600 |
| RIP1   | ENSGMOP00000019617 |
| RIP1   | ENSTRUP00000029781 |
| RIP1   | ENSGACP00000017178 |
| STAT1  | ENSGMOP00000013310 |
| STAT1  | ENSTRUP00000000221 |
| STAT1  | ENSP00000354394    |
| TAB1   | ENSTRUP00000000047 |
| TAB1   | ENSP00000333049    |
| TAB1   | ENSDARP00000053182 |
| TAB2   | ENSGMOP00000015412 |
| TAB2   | ENSTRUP00000019226 |
| TAB2   | ENSP00000445752    |
| TAK1   | ENSGMOP00000018726 |
| TAK1   | ENSGMOP00000002024 |
| TAK1   | ENSTRUP00000014299 |
| TAK1   | ENSP00000358335    |
| TIRAP  | ENSP00000376446    |
| TIRAP  | ENSGACP00000008666 |
| TIRAP  | ENSDARP00000103037 |
| TNF    | ENSP00000389265    |
| TNF    | ENSP00000365290    |
| TNF    | ENSDARP00000025726 |
| TNF    | ENSXETP00000005341 |
| TNF    | ENSMUSP00000025263 |

|        |                    |
|--------|--------------------|
| TNFA   | ENSP00000372988    |
| TNFA   | ENSDARP00000025726 |
| TNFA   | ENSTRUP00000014387 |
| TOLLIP | ENSGMOP00000011676 |
| TOLLIP | ENSP00000314733    |
| TOLLIP | ENSTRUP00000001350 |
| Tpl2   | ENSGMOP00000002622 |
| Tpl2   | ENSP00000443610    |
| Tpl2   | ENSTRUP00000007084 |
| TRAF3  | ENSGMOP00000015237 |
| TRAF3  | ENSTRUP00000013348 |
| TRAF3  | ENSP00000454207    |
| TRAF6  | ENSGMOP00000015220 |
| TRAF6  | ENSTRUP00000041697 |
| TRAF6  | ENSP00000433623    |
| TRAM   | ENSP00000415139    |
| TRAM   | Q8BJQ4             |
| TRIF   | ENSTNIP00000003841 |
| TRIF   | ENSP00000248244    |
| TRIF   | ENSDARP00000106233 |
| TRIF   | ENSDARP00000062684 |

**Supplementary table 6** – Atlantic cod *IL8* copies with contig location and abbreviations

| Assembly scaffold   | Abbreviation |
|---------------------|--------------|
| Contig1401_2        | IL8a         |
| Contig1401_rev      | IL8b         |
| Contig1401_1        | IL8c         |
| Contig1592_maybegap | IL8d         |
| Contig1411_noleader | IL8e         |
| Contig1549_rev      | IL8f         |
| Contig1411_1        | IL8g         |
| Contig1864_rev      | IL8h         |



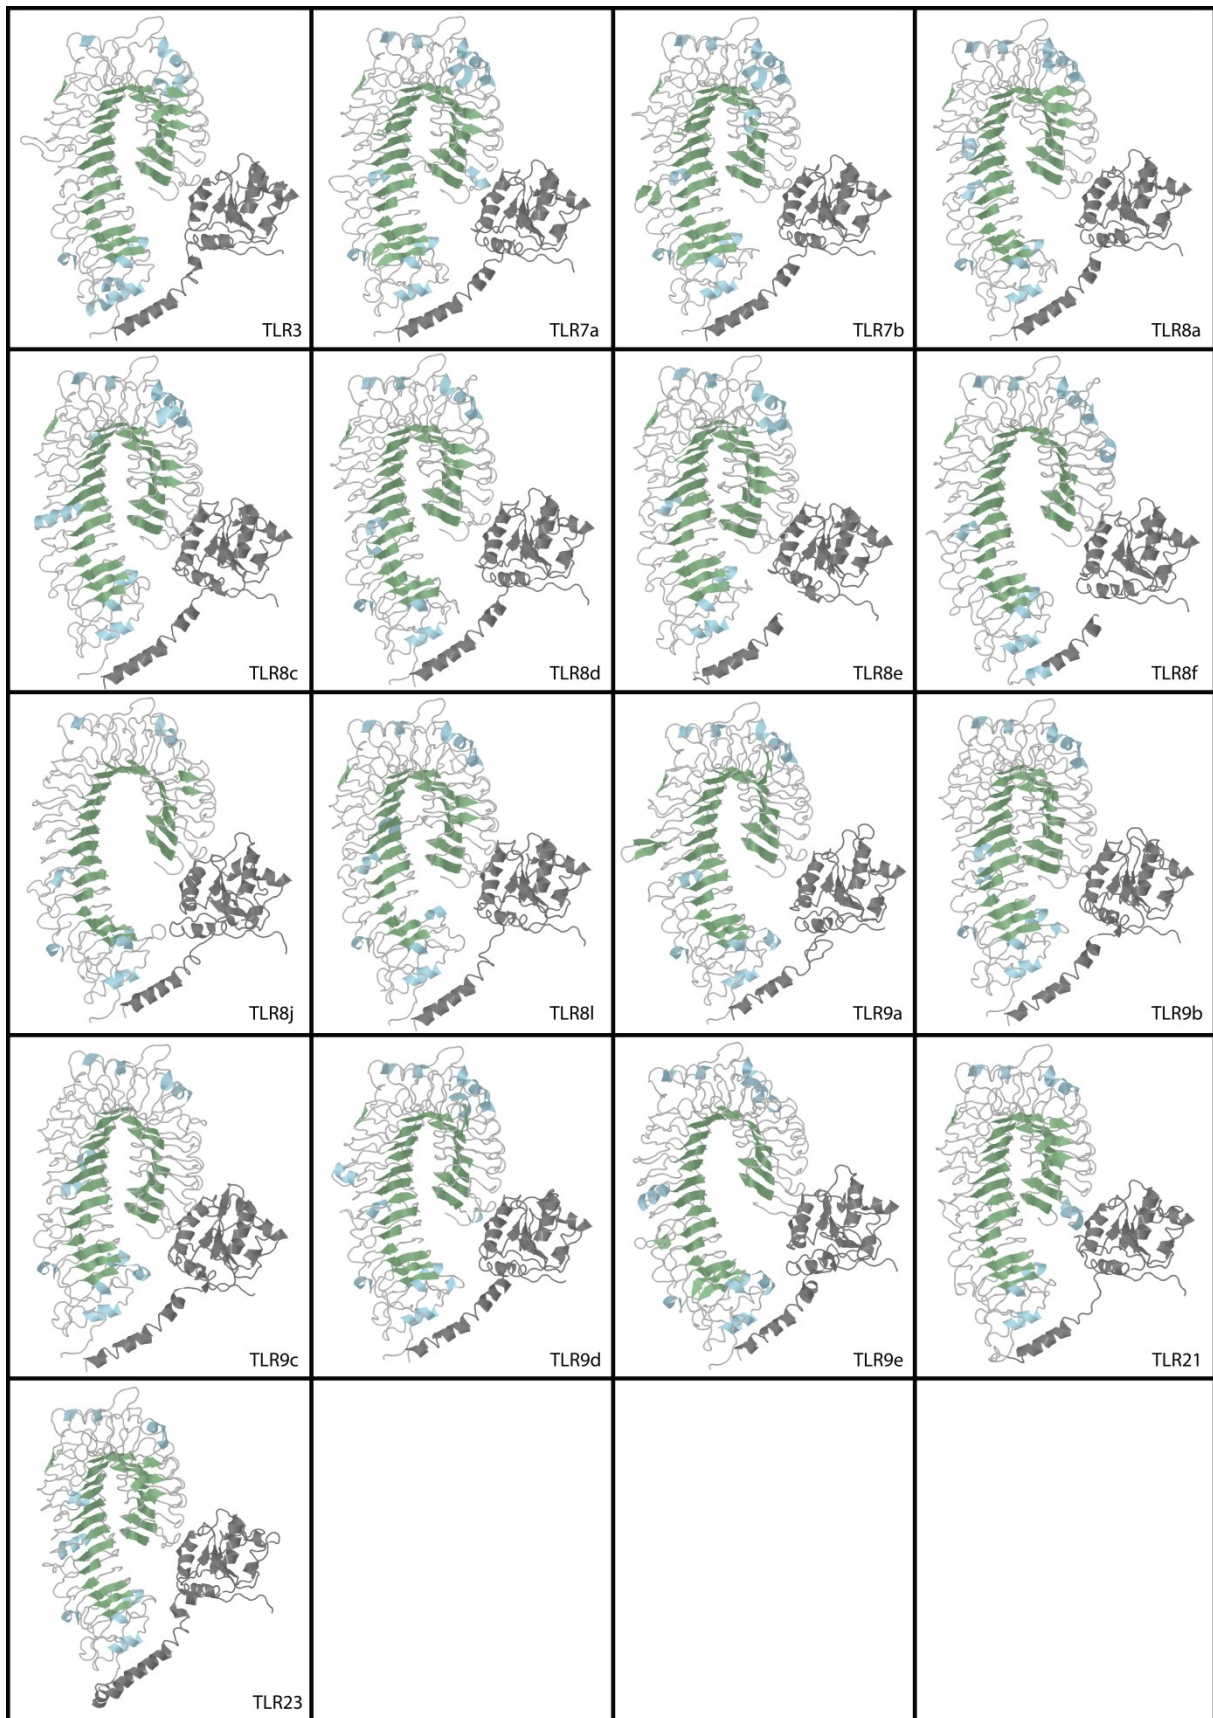

**Supplementary figure 1** – Protein structure models of likely intracellularly located TLRs in Atlantic. All are modelled onto the human TLR5 crystal structure. The transmembrane, linker and TIR domain is colored dark grey whereas the ecto-domain is colored light grey with its sheets in pale green and

helices in light blue. Sheets overlap with leucine-rich repeats in the ecto-domain. These TLRs display longer solenoid structures due to a larger number of leucine-rich repeat elements.

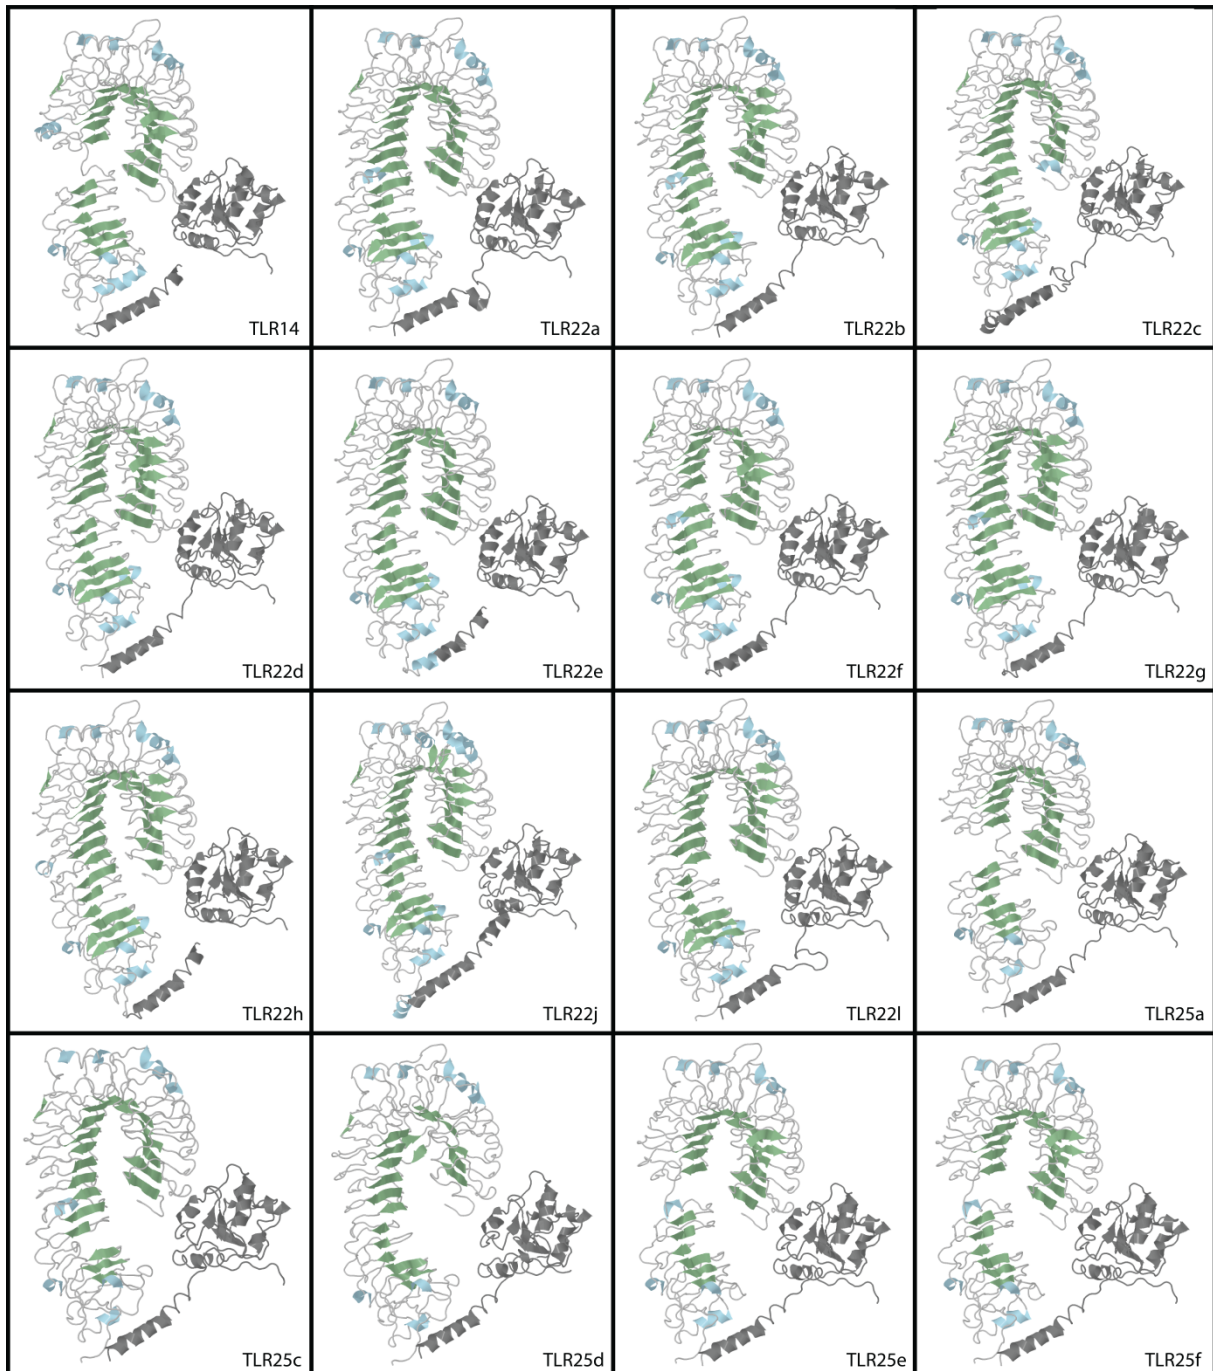

**Supplementary figure 2** - Protein structure models of likely plasma membrane associated TLRs in Atlantic. All are modelled onto the human TLR5 crystal structure. The transmembrane, linker and TIR domain is colored dark grey whereas the ecto-domain is colored light grey with its sheets in pale green and helices in light blue. Sheets overlap with leucine-rich repeats in the ecto-domain. These TLRs display shorter solenoid structures with the exception of TLR22( see references Matsuo, et al. 2008; Reyes-Becerril, et al. 2015; Salazar, et al. 2015 for more details on putative TLR22 function).

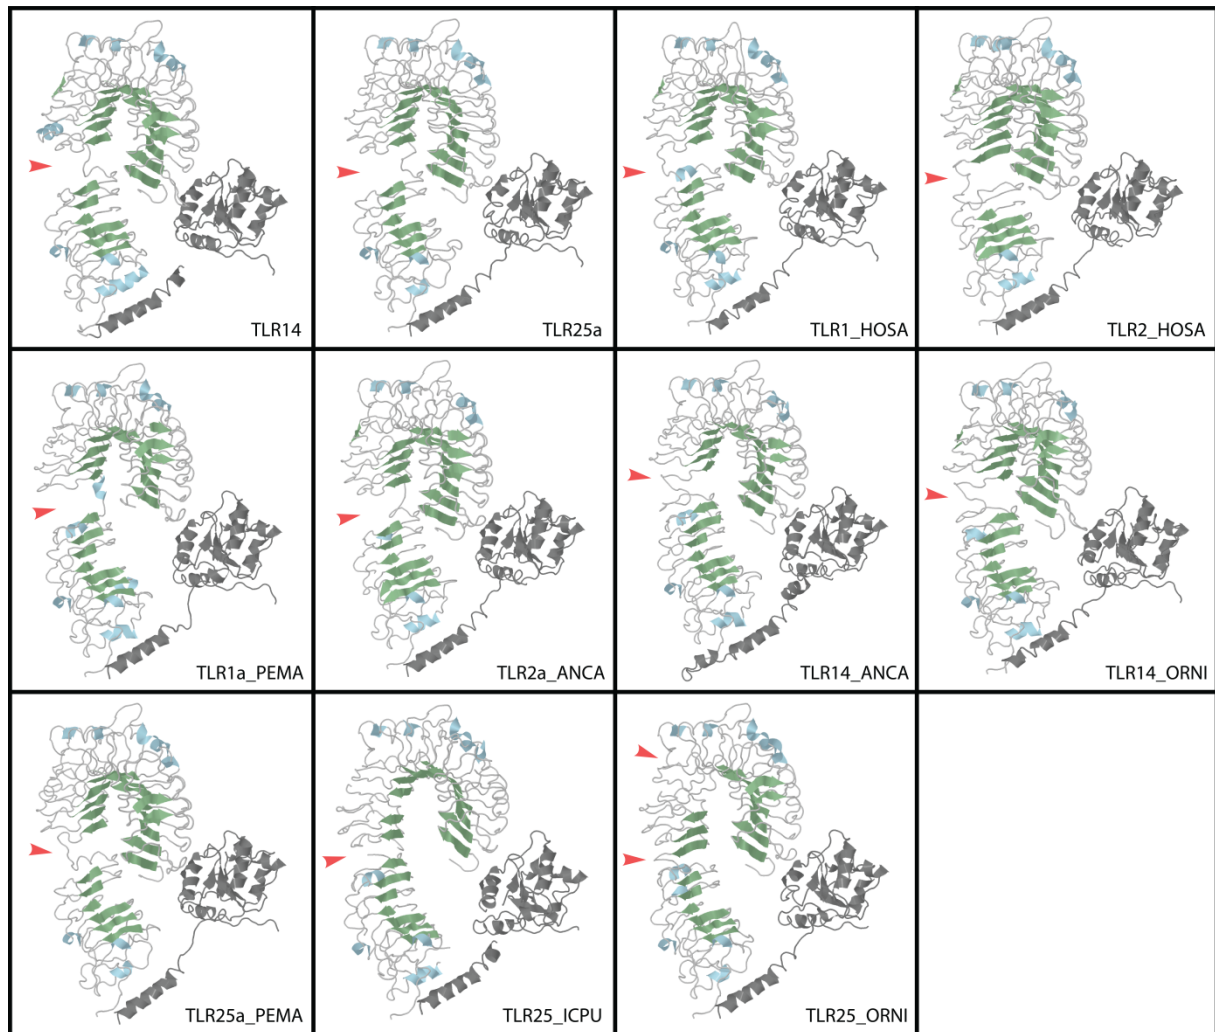

**Supplementary figure 3** – A comparison of protein structure models of *TLR1*-family TLRs in Atlantic cod, lamprey, anole lizard, tilapia and channel catfish. All are modelled onto the human TLR5 crystal structure. The transmembrane, linker and TIR domain is colored dark grey whereas the ectodomain is colored light grey with its sheets in pale green and helices in light blue. Sheets overlap with leucine-rich repeats in the ectodomain. The shorter solenoid structure reveals itself by longer loops being introduced into the predicted structure – here marked by red arrows.

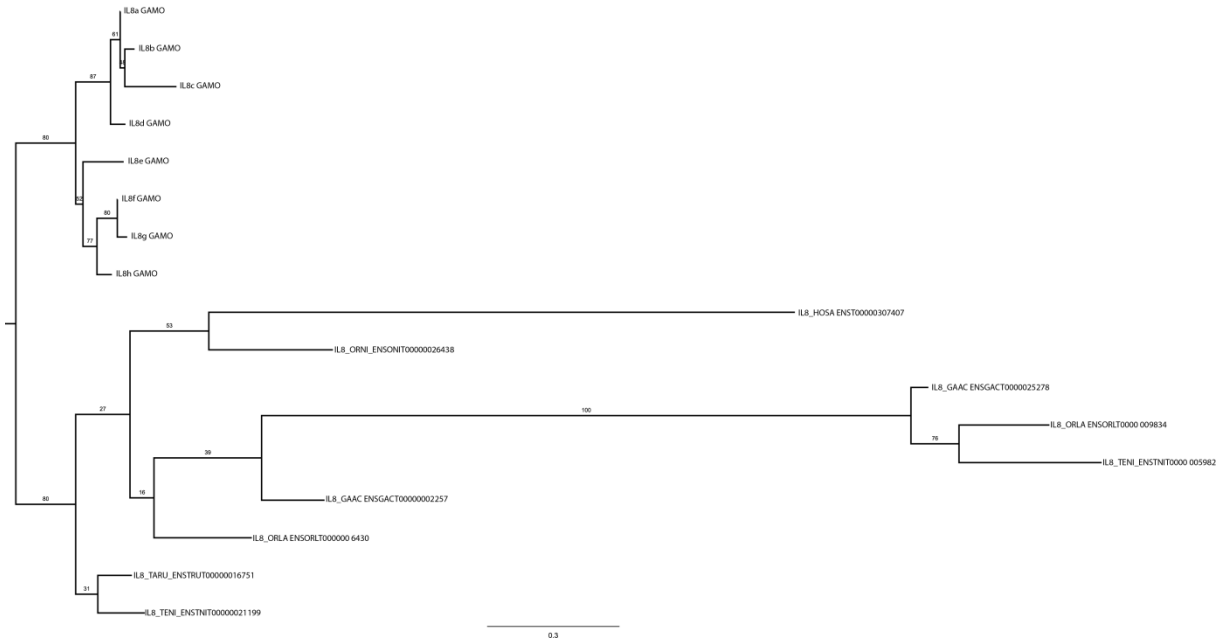

**Supplementary figure 4** – The Atlantic cod *IL8* copies together with *IL8* from fugu, tetraodon, medaka, tilapia, stickleback and human in a full length protein sequence ML-phylogeny with bootstrap values. Atlantic cod *IL8s* form two clades and we also found *IL8* duplications in some of the investigated fish species.
